# Supplementary material for: Assembly of poly(methacrylate)/purple membrane lamellar nanocomposite films by intercalation and in situ polymerisation
Source: Royal Society of Chemistry journal article supplement (doi:10.1039/c0jm01358g), 2010-01-01
Supplement: c0jm01358g.pdf [file c0jm01358g.pdf]

## Supplementary Information

### Assembly of poly(methacrylate)/purple membrane lamellar nanocomposite films by intercalation and *in-situ* polymerisation

Andrew M. Collins, Noor Haida Mohd Kaus, Francesca Speranza, Wuge H. Briscoe, Daniel Rhinow, Norbert Hampp, Stephen Mann<sup>\*</sup>

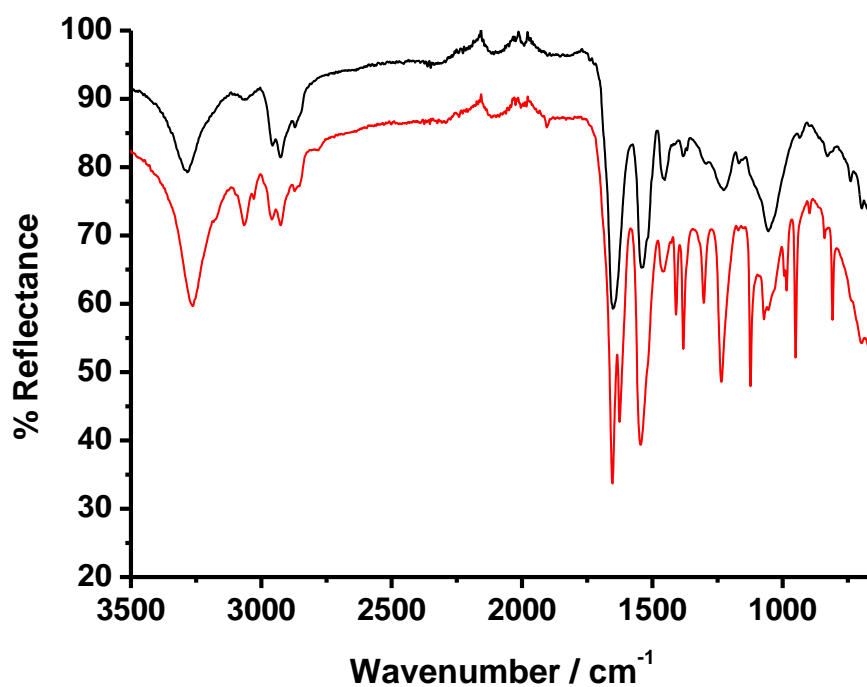

**Figure S1.** ATR-FTIR spectra of a PM-WT control film (black) and a polyMA/PM-WT composite film (red).

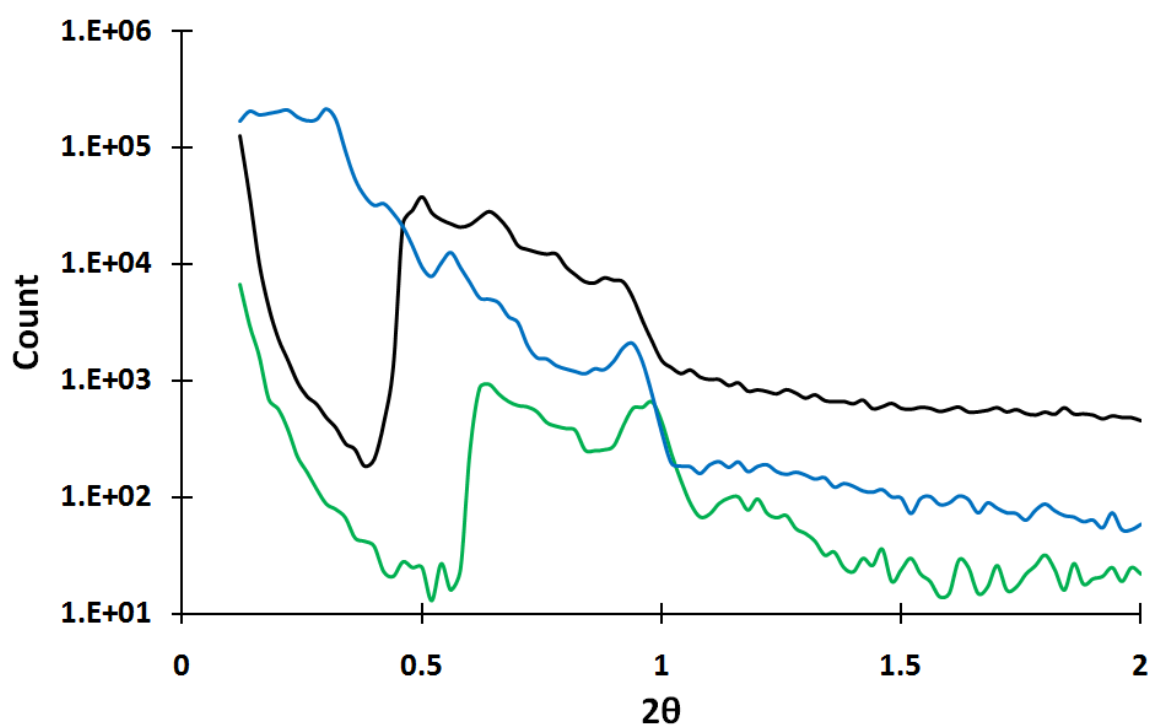

**Figure S2.** Off specular XRR scans for polyMA : PM ratio 1.2 : 1 composite films showing a range of interlayer peaks. Although the reflections are observed at a lower angle than for native (non-intercalated ) PM , the three repeated scans show some variance in the peak positions.
